# Supplementary material
Source: Research Square preprint supplement (doi:10.21203/rs.3.rs-9120322/v1)
Supplement: Supplementary file 1 [file 69263084b6884b5ba5e22f91.docx]

**Supplementary Materials**

*Accuracy Assessment: Confusion Matrices and Summary Tables*

Long-Term Habitat Dynamics in the Greater Kafue Ecosystem of Zambia

Using Multi-Temporal Landsat Data (1984–2024)

Gift Mulenga, Kennedy Kanja, Matamyo Simwanda, Vincent R. Nyirenda, and Darius Phiri

Supplementary Table S1: Confusion Matrix — 1984

| **Classified** | **Reference** | | | | | | | |
| --- | --- | --- | --- | --- | --- | --- | --- | --- |
| **Built-up** | **Forest** | **Grassland/Wetland** | **Cropland** | **Bare Ground** | **Water Bodies** | **Row Total** | **UA (%)** |
| **Built-up** | 97 | 3 | 2 | 9 | 6 | 0 | **117** | **82.9** |
| **Forest** | 0 | 76 | 0 | 3 | 0 | 0 | **79** | **96.2** |
| **Grassland/Wetland** | 0 | 3 | 98 | 1 | 0 | 8 | **110** | **89.1** |
| **Cropland** | 0 | 0 | 0 | 80 | 13 | 0 | **93** | **86** |
| **Bare Ground** | 1 | 2 | 0 | 5 | 50 | 1 | **59** | **84.7** |
| **Water Bodies** | 2 | 16 | 0 | 2 | 31 | 91 | **142** | **64.1** |
| **Column Total** | **100** | **100** | **100** | **100** | **100** | **100** | **600** |  |
| **PA (%)** | **97** | **76** | **98** | **80** | **50** | **91** |  |  |
| Overall Accuracy = 82% | Cohen’s Kappa (κ) = 0.784 | | | | | | | | |

Supplementary Table S2: Confusion Matrix — 1994

| **Classified** | **Reference** | | | | | | | |
| --- | --- | --- | --- | --- | --- | --- | --- | --- |
| **Built-up** | **Forest** | **Grassland/Wetland** | **Cropland** | **Bare Ground** | **Water Bodies** | **Row Total** | **UA (%)** |
| **Built-up** | 88 | 0 | 3 | 0 | 1 | 1 | **93** | **94.6** |
| **Forest** | 8 | 95 | 2 | 0 | 7 | 9 | **121** | **78.5** |
| **Grassland/Wetland** | 1 | 1 | 72 | 0 | 1 | 0 | **75** | **96** |
| **Cropland** | 0 | 1 | 17 | 100 | 0 | 1 | **119** | **84** |
| **Bare Ground** | 3 | 3 | 2 | 0 | 90 | 0 | **98** | **91.8** |
| **Water Bodies** | 0 | 0 | 4 | 0 | 1 | 89 | **94** | **94.7** |
| **Column Total** | **100** | **100** | **100** | **100** | **100** | **100** | **600** |  |
| **PA (%)** | **88** | **95** | **72** | **100** | **90** | **89** |  |  |
| Overall Accuracy = 89% | Cohen’s Kappa (κ) = 0.868 | | | | | | | | |

Supplementary Table S3: Confusion Matrix — 2004

| **Classified** | **Reference** | | | | | | | |
| --- | --- | --- | --- | --- | --- | --- | --- | --- |
| **Built-up** | **Forest** | **Grassland/Wetland** | **Cropland** | **Bare Ground** | **Water Bodies** | **Row Total** | **UA (%)** |
| **Built-up** | 96 | 0 | 4 | 2 | 0 | 6 | **108** | **88.9** |
| **Forest** | 1 | 92 | 0 | 12 | 0 | 17 | **122** | **75.4** |
| **Grassland/Wetland** | 1 | 1 | 68 | 1 | 0 | 3 | **74** | **91.9** |
| **Cropland** | 1 | 4 | 0 | 72 | 0 | 8 | **85** | **84.7** |
| **Bare Ground** | 0 | 1 | 7 | 0 | 100 | 2 | **110** | **90.9** |
| **Water Bodies** | 1 | 2 | 21 | 13 | 0 | 64 | **101** | **63.4** |
| **Column Total** | **100** | **100** | **100** | **100** | **100** | **100** | **600** |  |
| **PA (%)** | **96** | **92** | **68** | **72** | **100** | **64** |  |  |
| Overall Accuracy = 82% | Cohen’s Kappa (κ) = 0.784 | | | | | | | | |

Supplementary Table S4: Confusion Matrix — 2014

| **Classified** | **Reference** | | | | | | | |
| --- | --- | --- | --- | --- | --- | --- | --- | --- |
| **Built-up** | **Forest** | **Grassland/Wetland** | **Cropland** | **Bare Ground** | **Water Bodies** | **Row Total** | **UA (%)** |
| **Built-up** | 86 | 0 | 2 | 4 | 0 | 0 | **92** | **93.5** |
| **Forest** | 0 | 100 | 7 | 0 | 0 | 1 | **108** | **92.6** |
| **Grassland/Wetland** | 1 | 0 | 86 | 0 | 0 | 1 | **88** | **97.7** |
| **Cropland** | 0 | 0 | 4 | 78 | 0 | 0 | **82** | **95.1** |
| **Bare Ground** | 1 | 0 | 1 | 14 | 94 | 2 | **112** | **83.9** |
| **Water Bodies** | 12 | 0 | 0 | 4 | 6 | 96 | **118** | **81.4** |
| **Column Total** | **100** | **100** | **100** | **100** | **100** | **100** | **600** |  |
| **PA (%)** | **86** | **100** | **86** | **78** | **94** | **96** |  |  |
| Overall Accuracy = 90% | Cohen’s Kappa (κ) = 0.880 | | | | | | | | |

Supplementary Table S5: Confusion Matrix — 2024 Classification

| **Classified** | **Reference** | | | | | | | |
| --- | --- | --- | --- | --- | --- | --- | --- | --- |
| **Built-up** | **Forest** | **Grassland/Wetland** | **Cropland** | **Bare Ground** | **Water Bodies** | **Row Total** | **UA (%)** |
| **Built-up** | 80 | 10 | 0 | 3 | 0 | 2 | **95** | **84.2** |
| **Forest** | 3 | 87 | 0 | 0 | 0 | 0 | **90** | **96.7** |
| **Grassland/Wetland** | 8 | 1 | 89 | 15 | 2 | 1 | **116** | **76.7** |
| **Cropland** | 0 | 0 | 0 | 78 | 0 | 1 | **79** | **98.7** |
| **Bare Ground** | 7 | 0 | 5 | 3 | 98 | 0 | **113** | **86.7** |
| **Water Bodies** | 2 | 2 | 6 | 1 | 0 | 96 | **107** | **89.7** |
| **Column Total** | **100** | **100** | **100** | **100** | **100** | **100** | **600** |  |
| **PA (%)** | **80** | **87** | **89** | **78** | **98** | **96** |  |  |
| Overall Accuracy = 88% | Cohen’s Kappa (κ) = 0.856 | | | | | | | | |

Supplementary Table S6: Per-Class Producer’s Accuracy, User’s Accuracy, and F1-Score (1984–2024)

| **Land Cover Class** | **Metric** | **1984** | **1994** | **2004** | **2014** | **2024** |
| --- | --- | --- | --- | --- | --- | --- |
| **Built-up** | PA (%) | 97 | 88 | 96 | 86 | 80 |
| UA (%) | 82.9 | 94.6 | 88.9 | 93.5 | 84.2 |
| **F1 (%)** | **89.4** | **91.2** | **92.3** | **89.6** | **82.1** |
| **Forest** | PA (%) | 76 | 95 | 92 | 100 | 87 |
| UA (%) | 96.2 | 78.5 | 75.4 | 92.6 | 96.7 |
| **F1 (%)** | **84.9** | **86** | **82.9** | **96.2** | **91.6** |
| **Grassland/Wetland** | PA (%) | 98 | 72 | 68 | 86 | 89 |
| UA (%) | 89.1 | 96 | 91.9 | 97.7 | 76.7 |
| **F1 (%)** | **93.3** | **82.3** | **78.2** | **91.5** | **82.4** |
| **Cropland** | PA (%) | 80 | 100 | 72 | 78 | 78 |
| UA (%) | 86 | 84 | 84.7 | 95.1 | 98.7 |
| **F1 (%)** | **82.9** | **91.3** | **77.8** | **85.7** | **87.1** |
| **Bare Ground** | PA (%) | 50 | 90 | 100 | 94 | 98 |
| UA (%) | 84.7 | 91.8 | 90.9 | 83.9 | 86.7 |
| **F1 (%)** | **62.9** | **90.9** | **95.2** | **88.7** | **92** |
| **Water Bodies** | PA (%) | 91 | 89 | 64 | 96 | 96 |
| UA (%) | 64.1 | 94.7 | 63.4 | 81.4 | 89.7 |
| **F1 (%)** | **75.2** | **91.8** | **63.7** | **88.1** | **92.7** |
|  |  |  |  |  |  |
| **Macro F1 (%)** |  | **81.4** | **88.9** | **81.7** | **90** | **88** |
| **Overall Accuracy (%)** |  | **82** | **89** | **82** | **90** | **88** |
| **Cohen’s Kappa (κ)** |  | **0.784** | **0.868** | **0.784** | **0.880** | **0.856** |

Supplementary Table S7: Per-Class F1-Scores (%) for LULC Classification Accuracy Assessment

| **Year** | **Built-up** | **Forest** | **Grassland** | **Cropland** | **Bare Ground** | **Water Bodies** | **Macro F1** | **OA (%)** | **κ** |
| --- | --- | --- | --- | --- | --- | --- | --- | --- | --- |
| **1984** | 89.4 | 84.9 | 93.3 | 82.9 | 62.9 | 75.2 | **81.4** | **82** | **0.784** |
| **1994** | 91.2 | 86 | 82.3 | 91.3 | 90.9 | 91.8 | **88.9** | **89** | **0.868** |
| **2004** | 92.3 | 82.9 | 78.2 | 77.8 | 95.2 | 63.7 | **81.7** | **82** | **0.784** |
| **2014** | 89.6 | 96.2 | 91.5 | 85.7 | 88.7 | 88.1 | **90** | **90** | **0.880** |
| **2024** | 82.1 | 91.6 | 82.4 | 87.1 | 92 | 92.7 | **88** | **88** | **0.856** |

Supplementary Table S8: Complete Land Cover Change Metrics for the Greater Kafue Ecosystem (1984–2024)

| **Land Cover Class** | **1984 Area (ha)** | **2024 Area (ha)** | **Persistence (ha)** | **Gross Gain (ha)** | **Gross Loss (ha)** | **Net Change (ha)** | **Net Change (%)** | **Swap (ha)** | **Annual Rate (ha/yr)** |
| --- | --- | --- | --- | --- | --- | --- | --- | --- | --- |
| **Built-up** | 1,173 | 39,488 | 662 | 38,826 | 512 | **+38,314** | **+3,265.4** | 1,023 | +958 |
| **Forest** | 8,364,417 | 4,998,873 | 4,865,444 | 133,429 | 3,498,973 | **-3,365,544** | **-40.2** | 266,858 | -84,139 |
| **Cropland** | 84,553 | 1,426,186 | 75,554 | 1,350,632 | 8,999 | **+1,341,633** | **+1,586.7** | 17,997 | +33,541 |
| **Grassland** | 1,242,708 | 3,207,675 | 896,882 | 2,310,793 | 345,827 | **+1,964,966** | **+158.1** | 691,653 | +49,124 |
| **Bare Ground** | 79,794 | 107,995 | 1,029 | 106,965 | 78,764 | **+28,201** | **+35.3** | 157,529 | +705 |
| **Water** | 42,021 | 34,450 | 33,507 | 943 | 8,513 | **-7,570** | **-18.0** | 1,886 | -189 |
| **Natural Habitat** | **9,649,146** | **8,240,998** |  |  |  | **-1,408,148** | **-14.6** |  | **-35,204** |
| **Disturbed** | **165,520** | **1,573,668** |  |  |  | **+1,408,148** | **+850.7** |  | **+35,204** |

Supplementary Table S9: Land Cover Persistence, Gain, and Loss in the Greater Kafue Ecosystem (1984–2024)

| **Land Cover Class** | **1984 Area (ha)** | **1984 (%)** | **2024 Area (ha)** | **2024 (%)** | **Persistence (ha)** | **Gain (ha)** | **Loss (ha)** |
| --- | --- | --- | --- | --- | --- | --- | --- |
| **Built-up** | 1,173 | 0.01 | 39,488 | 0.40 | 662 | 38,826 | 512 |
| **Forest** | 8,364,417 | 85.22 | 4,998,873 | 50.93 | 4,865,444 | 133,429 | 3,498,973 |
| **Cropland** | 84,553 | 0.86 | 1,426,186 | 14.53 | 75,554 | 1,350,632 | 8,999 |
| **Grassland** | 1,242,708 | 12.66 | 3,207,675 | 32.68 | 896,882 | 2,310,793 | 345,827 |
| **Bare Ground** | 79,794 | 0.81 | 107,995 | 1.10 | 1,029 | 106,965 | 78,764 |
| **Water** | 42,021 | 0.43 | 34,450 | 0.35 | 33,507 | 943 | 8,513 |
